**Title: Effectors from a Bacterial Vector-Borne Pathogen Exhibit Diverse  
Subcellular Localization, Expression Profiles and Manipulation of Plant Defense**

**Running title:** Characterizing *Liberibacter solanacearum* effectors

Reyes-Caldas PA<sup>1</sup>, Jie Zhu<sup>1</sup>, Breakspear A<sup>2</sup>, Thapa SP<sup>1</sup>, Toruño T<sup>1</sup>, Perilla-Henao L<sup>1</sup>,  
Casteel C<sup>1,3</sup>, Faulkner C<sup>2</sup>, and Coaker G<sup>1\*</sup>

<sup>1</sup>*Plant Pathology Department, University of California, Davis, CA, United States.*

<sup>2</sup>*The John Innes Centre, Norwich Research Park, Norwich, UK*

<sup>3</sup>*School of Integrative Plant Science, Plant-Microbe Biology and Plant Pathology Section,  
Cornell University, Ithaca, NY, United States.*

\*Correspondence to: [glcoaker@ucdavis.edu](mailto:glcoaker@ucdavis.edu)

**Material distribution:** The author responsible for distribution of materials integral to the findings presented in this article in accordance with the policy described in the Instructions for Authors (<https://academic.oup.com/plcell/pages/General-Instructions>) is Gitta Coaker

## ABSTRACT

Climate change is predicted to increase the prevalence of vector borne disease due to expansion of insect populations. *Candidatus* *Liberibacter solanacearum* (Lso) is a phloem-limited pathogen associated with multiple economically important diseases in Solanaceous crops. Little is known about the strategies and pathogenicity factors Lso uses to colonize vector and host. We determined the Lso effector repertoire by predicting SEC secreted proteins across four different Lso haplotypes. Compared with *C. Liberibacter asiaticus*, the causal agent of citrus Huanglongbing, Lso possess a more variable effector repertoire, with greater similarity between haplotypes infecting the same host. The localization of Lso effectors in *Nicotiana* revealed diverse subcellular targets. The majority of tested effectors were unable to suppress plant immune responses, indicating they possess unique activities. Expression profiling in tomato and the psyllid *Bactericera cockerelli* indicated Lso differentially interacts with its vector and host and can switch effector expression in response to the environment. This study reveals Lso effectors possess complex expression patterns, target diverse host organelles and the majority are unable to suppress host immune responses, unlike effectors from foliar plant pathogenic bacteria. A mechanistic understanding of Lso effector function will reveal novel targets and provide insight into phloem biology.

## INTRODUCTION

Vector-borne diseases (VBDs) reduce agricultural productivity and disrupt ecosystems throughout the world. Rising global temperatures are predicted to increase insect populations and fitness, exacerbating the dispersion of emergent VBDs (Deutsch et al., 2018). Some of the most widespread and devastating VBDs are associated with *Liberibacter*. *Liberibacter*s are gram-negative, obligate, phloem-limited bacterial pathogens that are transmitted by different psyllid vectors onto plant hosts (Perilla-Henao and Casteel, 2016). Huanglongbing (HLB) disease, also known as Citrus Greening, is primarily associated with *Candidatus* *Liberibacter asiaticus* (Las) and is considered the most important citrus disease worldwide (Singerman and Rogers, 2020).

*C. Liberibacter solanacearum* (Lso) is associated with economically important diseases on a variety of Solanaceous and Apiaceous hosts, including tomato (Tomato Psyllid Yellows) and potato (Zebra Chip). A comprehensive understanding of the pathogen, host and vector is required to combat VBD.

Piercing-sucking insects, such as psyllids, insert their stylet into plant hosts and probe the apoplast as well as other cell types before reaching phloem. During probing, insects secrete watery saliva containing HAMPs (herbivore associated molecular patterns), and other microbial features derived from bacteria present in their body/salivary glands (Chaudhary et al., 2014; Jaouannet et al., 2014). Common immune responses in the phloem include the induction of reactive oxygen species (ROS), Ca<sup>2+</sup> influx, phytoalexin accumulation, callose deposition and activation of occlusion proteins (Huang et al., 2020). Although *Liberibacter* is restricted to phloem tissue, it can move vertically through sieve pores to colonize hosts (Hartung et al., 2010; Achor et al., 2020). *Liberibacter* proliferation in sink tissues is accompanied by excessive callose deposition and starch accumulation, probably causing phloem dysfunction (Koh et al., 2012; Etxeberria et al., 2009; Granato et al., 2019). Genomic analyses has shed some light onto *Liberibacter* biology. Candidate virulence factors present in the genome of *Liberibacter* species include a large number of ATP-binding cassette (ABC) transporters and membrane proteins, likely involved in import of metabolites (Lin et al., 2011; Lin and Civerolo, 2014). *Liberibacter* also possess members of the repeats-in-toxin (RTX) toxin superfamily and bifunctional proteins implicated in virulence in other Gram-negative bacteria (Benz, 2020; Gilkes et al., 2018). Several enzymes required for ROS detoxification including a superoxide dismutase, thioredoxin, peroxiredoxin and glutathione oxidoreductase are also present and expressed during infection (Singh et al., 2017; Jain et al., 2018).

Like other plant pathogenic bacteria, *Liberibacters* have the capability to secrete pathogen proteins, called effectors, that modify their host. Expression profiles from vector-borne pathogens, including *Las* and *Phytoplasma* spp., highlight individual effectors that may also be involved in colonization of the vector. *Liberibacter* species

lack specialized secretion systems for specific delivery of effector proteins into host cells, but harbor all the essential components of the secretion (Sec) machinery and are capable of secreting effectors outside their own cell (Prasad et al., 2016). Predicted Las effectors are small, which predicts their ability to move symplastically *in planta* away from the sieve elements through plasmodesmata. SDE1, a small secreted Las effector protein, has been demonstrated to move far from the point of infection either by phloem transport or cell-to-cell movement through plasmodesmata (Pagliaccia et al., 2017). Phytoplasmas, another class of insect-vectored phloem-limited bacterial pathogens, also secrete effectors that move through plasmodesmata to manipulate their host (Tomkins et al., 2018).

To date, only a handful of *Liberibacter* effectors from any species have been characterized. Las Sec-dependent effector 1 (SDE1) is preferentially expressed in citrus and periwinkle hosts, suppresses plant defense by targeting plant immune proteases, and transgenic plants expressing SDE1 phenocopy leaf blotchy mottle disease symptoms (Pagliaccia et al., 2017; Clark et al., 2018, 2020). Las SDE15 and Lso-hypothetical protein effector 1 (HPE1) were also reported to suppress plant cell death (Pang et al., 2020; Levy et al., 2019). Phytoplasma effectors such as TENGU and SAP11 target transcription factors involved in the production of phytohormones, inducing disease phenotypes such as witches broom and flower sterility in addition to impairing plant defenses and vector performance (Sugio et al., 2011; Tan et al., 2016; Dermastia, 2019). Despite the importance of bacterial effectors in promoting vector-borne disease development, little is known about the identity, conservation and role of Lso effectors. Breakthroughs in understanding *Liberibacter* pathogenicity mechanisms could be achieved using Lso as a model system due to the ability to study disease in amenable hosts including *Nicotiana tabacum*, *Nicotiana benthamiana* and *Solanum lycopersicum* (tomato) (Huang et al., 2021).

Lso is the most recently evolved species within the *Liberibacter* genus and is divided into 12 haplotypes with different vector and host preferences; three are associated with diseases in Solanaceous plants (A, B and F) and six are reported in a wide range of

Apiaceous crops (C, D, E, H, Cras1 and Cras2) (Thapa et al., 2020; Sumner-Kalkun et al., 2020). Typical symptoms of Lso infection are hard to generalize since distinct haplotypes cause different symptomatology (Mendoza-Herrera et al., 2018). Lso haplotypes A and B are capable of systemically colonizing and propagating in both vector (*Bactericera cockerelli*) and host (tomato and potato). Because of their inability to be cultured and their specific phloem localization, understanding the etiology and biology of the diseases caused by Liberibacters has been challenging (Huang et al., 2020). Currently there is no genetic resistance in cultivated plant germplasm and increasing resistance to insecticides pose a high risk for disease epidemics (Chávez et al., 2015; Szczepaniec et al., 2019).

Here, we studied Lso effectors to gain insight into disease development. SEC secreted effectors were identified from four different Lso haplotypes. Lso effector localization was analyzed after transient expression in *Nicotiana*. We evaluated the ability of Lso effectors to suppress early markers of plant defense in response to perception of pathogen features. Despite diverse subcellular localizations, the majority of tested effectors were unable to suppress host immune responses, indicating they possess unique activities. Expression profiling in tomato and the psyllid *B. cockerelli* highlighted three patterns of effector expression: early and late acting effectors, preferential expression in the vector or host, and constitutive effector expression across vector and host. This study highlights promising Lso effectors for future investigation.

## RESULTS

### 2.1 The Lso SEC-effector repertoire varies in size and composition

To begin investigating how Lso is able to colonize two distinct organisms and thrive in the phloem environment we predicted suites of SEC-dependent effectors across four different Lso haplotypes (A-D). Lso genomes were downloaded from NCBI, including three from haplotype A (LsoNZ1, HenneA, R1), two from haplotype C (FIN111 and

FIN114) and one from haplotypes B and D (CLso-ZC1 and ISR100, respectively; Fig 1A)(Lin et al., 2011; Zheng et al., 2014; Thompson et al., 2015; Wang et al., 2017). Genome CP002371.1 (CLso-ZC1) is completely finished, while the others are draft genomes. SEC dependent effectors were predicted using SignalP and filtered to remove proteins larger than 35KDa that may not move through plasmodesmata as well as those with predicted transmembrane domains. We found 13 effectors that are conserved in all the haplotypes screened (core) and 27 that were found in several but not all haplotypes (variable). In addition, each haplotype carries several unique effectors. Each haplotype carried between 27-36 predicted effectors (Table S1), with haplotypes C-D having the smallest (27-29) and haplotypes A-B having the largest (34-36) repertoires (Fig 1B). In total, we estimate the repertoire of effectors across Lso haplotypes to be ~27, comprising 13 core, 6 variable, and 8 unique effectors (Fig 1B). These estimates could change with the sequencing of new strains and haplotypes.

Next, we analyzed effector conservation across Lso haplotypes. None of the identified effectors share over 44% amino acid identity with proteins outside of their genus, indicating that these effectors are unique to *Liberibacter* and their function cannot be predicted by homology. Only one effector, HPE74, possessed an identifiable domain Cupredoxin\_1 domain PF13473 (Table S1), which is predicted to bind a type I copper redox site and involved in electron transfer reactions (Dennison, 2013). To better understand the role of effector repertoires in the context of phylogenetic relationships, we performed phylogenetic analyses of Lso haplotypes using 825 orthologous genes and compared it with phylogeny generated from the 13 core effectors (Fig 1D). In general, the topology of both trees was similar. Analyses of variable and core effectors across haplotypes revealed that haplotypes A and B and haplotypes C and D are the most similar to each other (Fig 1C, 1E), which is incongruent with their phylogeny but does coincide with their host range (Figs 1D, E). We observed variation at the nucleotide level for the same effector between haplotypes (Fig 1E). For example, HPE2, which is a core effector, possesses 80-93% amino acid similarity between haplotypes. It is possible that the combination of genome reduction associated with intracellular

lifestyle, high AT content, and continuing expansion of *Liberibacter* geographical range are driving these observations.

## **2.2 Lso SEC-effectors localize to different host compartments**

Haplotypes A and B possess a similar repertoire of effectors and exhibit similar host range, causing disease in potato and tomato (Fig 1B-E). Haplotype B is more aggressive on both tomato and potato (Wen et al., 2013). Therefore, we focused on SEC-dependent effectors shared between haplotypes A and B (Fig 1C) or unique for haplotype B for further analyses.

To gain insight into the possible role of Lso SEC-dependent effectors, we evaluated their subcellular localization by fusing the mature effector (without signal peptide) with an N-terminal turboGFP (tGFP) tag using Golden Gate technology (Fig 2A). turboGFP is a copGFP variant with more rapid folding and increased fluorescence (Shagin et al., 2004). tGFP-mEffector fusions were visualized by confocal microscopy using *Agrobacterium*-mediated transient expression on *Nicotiana benthamiana*. Effector expression was verified using anti-tGFP immunoblot (Fig S2). We were able to detect full-length protein expression for the majority of effectors tested (Fig S2). We were unable to detect GFP expression for five effectors using anti-tGFP immunoblot but were able to visualize them by confocal microscopy (HPE2, HPE7, HPE16, HPE21 and HPE73) (Fig S2, data not shown).

HPE13, HPE14 and HPE21 are all present in a genomic island that is unique to haplotype B and exhibit diverse subcellular localizations (Table S1). We observed HPE13 in the plasma membrane (Fig 2B). To confirm HPE13 localization, we induced plasmolysis with 1M NaCl and were able to observe Hechtian strands stretching between the plasma membrane and the cell wall in tGFP-HPE13 expressing cells (Fig 2B, right panel). Bacteria occasionally hijack the palmitoylation machinery of the host cell and undergo lipidation to accumulate in membranes. HPE13 was predicted to have

a S-palmytilation site in the C-terminus by GPS-Palm (Ning et al., 2021). This post-translational modification may target HPE13 to plant membranes.

In contrast to HPE13, HPE14 and HPE21 target vesicle-like structures and a eukaryotic organelle, respectively. HPE14 localized to an undetermined vesicle like structure that did not co-localize with the Golgi marker (soybean  $\alpha$ -1,2-mannosidase I) or completely with the ER marker SP-mCherry-HDEL (Fig S3B). HPE21 localized to punctate structures that were ubiquitously distributed in the cytoplasm. HPE21 did not co-localize with the Golgi marker (soybean  $\alpha$ -1,2-mannosidase I) (Fig S3A). Instead HPE21 targeted peroxisomes and co-localized with 1-PTS1 peroxisomal-targeted mCherry (Fig 2C). To confirm the colocalization of HPE21, we plotted the intensity profiles of each fluorophore across a linear section, as shown in Fig 2C. The intensity profiles of tGFP-HPE21 and the peroxisome marker matched exactly. HPE9 accumulated in the perinuclear membrane (Fig 2D). Further examination of HPE9 indicates this effector co-localizes with the ER marker SP-mCherry-HDEL (Fig 2D) and accumulates in the ER. Altogether, these results suggest Lso effectors target specific eukaryotic subcellular compartments.

### **2.3 Lso effectors target specific subnuclear compartments**

Multiple *Phytoplasma* effectors target plant nuclei to reprogram their hosts (Tomkins et al., 2018). We were keen to understand if nuclear targeting is a common strategy amongst phloem-limited plant pathogenic bacteria. Seven proteins were to encode a monopartite or bipartite nuclear localization signal (NLS): HPE2, HPE8, HPE9, HPE15, HPE16, HPE22 and HPE30. However, only four effectors exhibited exclusive nuclear localization: HPE16, HPE18, HPE19 and HPE73, (Fig 3C, Fig S1). HPE18 is found in haplotypes A, B, and D; HPE19 is found exclusively in haplotypes B and D; HPE8, HPE16, and HPE73 are core effectors (Table S1). HPE8 preferentially accumulates in the nucleus but is also found in the cytoplasm (Fig 3B). Interestingly, we found HPE16 present in fast-moving punctate bodies inside the nucleus (Fig 3C, Video S1). These structures, known as nuclear speckles, are important for RNA metabolism and possibly



facilitate regulation of gene expression (Reddy et al., 2012; Bazin et al., 2018). HPE18 accumulates in the nucleolus, while HPE73 accumulates in both the nucleus and nucleolus (Fig S1B). The majority of Lso effector proteins, 16 out of 23 tested effectors, exhibited nuclear cytoplasmic localization (Fig 3, Fig 4, Fig S1). Five effectors exhibited sole or predominant nuclear localization. These data highlight the importance of effector nuclear targeting in *Liberibacter*.

## 2.4 Lso HPE19 targets nuclei and chloroplasts

Investigating HPE19 localization was challenging due to low-level expression. To enhance HPE19 expression, we cloned HPE19 with a tGFP tag under a dexamethasone inducible promoter and induced expression with dexamethasone 12 hours post infiltration (hpi). tGFP-HPE19 expressed under an inducible promoter revealed differences in its subcellular localization overtime. At 24hpi, we observed nuclear localized HPE19 (Fig 3C, 4A). However, fluorescence was detected in primarily in chloroplasts and stromule-like projections 48hpi (Fig 4B, inset). HPE19 chloroplast localization was supported by overlapping tGFP fluorescence and chloroplast autofluorescence intensity profiles across a linear section at 48hpi but not 24hpi (Fig 4A-B). Chloroplasts showing tGFP-HPE19 fluorescence were also observed nearby nuclei. A 3D reconstruction of 20 images found that chloroplasts completely surround tGFP-HPE19 positive, but not control tGFP nuclei (Fig 4C). Clustering of chloroplasts around nuclei has been observed in plant-pathogen interactions and is believed to be important for plant defense activation (Krenz et al., 2012; Park et al., 2018a; Ding et al., 2019). In addition, nuclei possessing tGFP-HPE19 exhibited abnormalities such as misshapen edges, flattened appearance and small size (Fig 4D, S4). Expression of HPE19 under a 35S or inducible promoter did not induce visible cell-death (Data not shown). However, HPE19 is able to enhance ROS and Ca<sup>2+</sup> production in response to chitin perception (Fig 4E-F). Contrary to our expectations, HPE19 suppressed ROS production in response to flg22, indicating this effector does not universally enhance plant responses to all pathogen features (Fig 4F). It is possible that tGFP-HPE19

weakly activates plant defense or alters other processes resulting in stress response and nuclear dysfunction.

## 2.5 Lso SEC-dependent effectors are able to move cell-to-cell

Lso is a phloem-limited bacterial pathogen and is confined to sieve elements (Secor et al., 2009). Sieve elements are metabolically inactive enucleated cells that heavily rely on companion cells for their function. The specific localization of Lso effectors in eukaryotic compartments indicates these proteins can move to companion cells and other neighboring cell types to target host compartments. To determine the ability of Lso effectors to move intercellularly, mature Lso effectors were C-terminally fused to eGFP and co-expressed with nuclear tdTomato (Fig 5A). As a positive control, we co-expressed the highly mobile eGFP with nuclear tdTomato. As a negative control, we co-expressed the nonmobile 2xeGFP with nuclear tdTomato. NLS-tdTomato and the 2xeGFP control are too large to diffuse cell-to-cell. A low concentration of *Agrobacterium* was used to facilitate single-cell transformation. Effector mobility was observed 24h after *Agrobacterium*-mediated transient expression in epidermal cells of *N. benthamiana*. Cell-to-cell movement was visualized in cells with green fluorescence surrounding an original transformation event. A clear positive result for this assay requires robust effector expression.

We were able to detect movement of two out of five tested Lso effectors (HPE1, HPE8, HPE9, HPE16, HPE19). Out of 11 isolated single cell transformation events, we observed eight (72.7%) instances of HPE1 movement to adjacent cells (Fig 5B, S5). HPE1 was previously characterized as a plant cell death suppressor. We also visualized movement of HPE8, which accumulates highly in the nucleus and is easy to visualize. Out of 11 isolated single cell transformation events, we observed 10 (90.9%) instances of HPE8 movement to adjacent cells (Fig 5B, S5). Differences in the size of HPE1 (11.32KDa) and HPE8 (8.78KDa) could account for the more limited movement of HPE1. Only 16.7% positives were observed for the 2xeGFP negative control, and 100% positives were observed for the eGFP positive control, indicating that the movement

system is working properly. These data provide evidence that a subset of Lso effectors are capable of cell-to-cell movement.

## 2.6 The majority of Lso SEC-dependent effectors do not suppress plant immunity

The most well characterized function of pathogen effectors is their ability to suppress defense responses (Toruño et al., 2016). We investigated the ability of Lso effectors to suppress plant immune defenses. In order to investigate immune suppression, we analyzed two hallmarks of plant immunity:  $Ca^{2+}$  influx and production of ROS. These responses also comprise early defense markers that have been reported in phloem (Gaupels et al., 2017).

We evaluated effector-mediated suppression of plant immune responses to two pathogen features: flg22 and chitin. Flg22 is an immunogenic peptide of flagellin perceived by the surface-localized receptor FLS2. Chitin is an oligosaccharide present in the cell walls of fungi and exoskeletons of insects that is perceived by LysM domain containing surface-localized immune receptors. Cytosolic  $Ca^{2+}$  accumulation was quantified in a transgenic *N. benthamiana* Aequorin reporter line (Segonzac et al., 2011). Lso effectors were transiently expressed alongside with tGFP in *N. benthamiana*, 24h later, leaf tissue was collected and floated on coelenterazine solution for at least 12h and challenged with chitin or flg22. We analyzed ten effectors representing different subcellular localizations (Fig 3, 4, 6, S1). Surprisingly, Lso effectors failed to suppress the intracellular accumulation of  $Ca^{2+}$  upon perception of flg22 or chitin (Fig 6A, 6C). Only HPE16 was able to inhibit the  $Ca^{2+}$  influx after chitin challenge. Several effectors increased  $Ca^{2+}$  influx upon perception of either flg22 (HPE8, HPE13) or chitin (HPE19) (Fig 4I, 6A, 6C). While some effectors displayed a similar trend of increased  $Ca^{2+}$  influx, these results were not statistically significant.

Next, we examined whether Lso effectors alter ROS production in response to perception of flg22 and chitin. Lso effectors were infiltrated alongside with tGFP and transiently expressed in *N. benthamiana*, 24h later leaf tissue was collected, floated in

water overnight and challenged with either immunogenic feature. In general, the majority of tested effectors failed to suppress the ROS production elicited by either flg22 (Fig 6B) or chitin (Fig 6D). Only three effectors consistently inhibited ROS production (Fig 4, 6B, 6D). HPE16 suppresses chitin induced ROS and Ca<sup>2+</sup> influx, but does not significantly alter flg22-induced responses (Fig 6). HPE19 was able to suppress flg22-induced ROS, but enhanced ROS and Ca<sup>2+</sup> influx after chitin treatment (Fig 4E-F). Differential suppression of flg22 and chitin immune outcomes have been reported for *Pseudomonas syringae* Type III effectors (Gimenez-Ibanez et al., 2018). Lso effectors involved in plant immune suppression may target different immune signaling components. Altogether these data indicate that the majority of Lso effectors are not capable of suppressing plant immune hallmarks. This pattern is strikingly different compared to the extensive defense suppressing effector activity of other Gram-negative foliar pathogens, including *P. syringae* (Guo et al., 2009).

## **2.7 Differential expression of Lso effectors in the plant and the vector.**

Insect-vectored plant pathogens must be able to adapt to two drastically different environments: their vector and host. Lso SEC-dependent effectors likely contribute to the ability to colonize plant sieve elements and propagate in *B. cockerelli*. We hypothesized that Lso expresses different suites of effectors in vector and host, which can provide insight into contribution of specific effectors in disease development. We investigated the expression of Lso effectors in tomato and in *B. cockerelli* using one-step RT-qPCR. Synchronized *B. cockerelli* colonies infected with haplotype B were used to transmit Lso onto tomato cv. MoneyMaker (Fig 7A). Psyllids were kept in a muslin bag and 72h after vector transmission, removed for RNA extraction. Midribs were extracted from the original inoculated leaf one-month post-inoculation. Upregulated and downregulated genes in each treatment were identified after normalizing to the Lso housekeeping gene *GlnA*. We were able to identify 5 effectors that are strongly expressed in tomato one-month post-inoculation compared to the psyllid (HPE2, HPE3, HPE16, HPE27, HPE74; Fig7B). We also identified 5 effectors that are strongly expressed in the psyllid compared to tomato (HPE4, HPE6, HPE15,

HPE18, HPE33). Nine effectors were more uniformly expressed in both organisms (Fig7B). Collectively, these data support the hypothesis that some Lso effectors are required for eukaryotic colonization, but other suites of effectors are differentially deployed to manipulate host and vector.

In infected plants, *Liberibacter* distribution and titers and disease symptoms are patchy and variable from plant-to-plant (Li et al., 2009b, 2009a). We also observed differences in Lso titers between plant samples where Ct values of the Lso housekeeping gene *RecA* at week one varied between 26.89-34.0 and at week four varied between 22.74-24.61. *Liberibacter* infection is characterized by an asymptomatic period followed by the development of disease. In addition, disease symptoms can take months to years to develop, depending on the plant host. Due to the long latent period for disease development, we hypothesize that Lso differentially expresses effectors depending on infection stage. To this end, we also compared effector expression in tomato at one week and four weeks post-vector transmission.

Although there was variation between biological samples, we identified sets of early (Fig 7C, top panel) and late (middle panel) acting effectors. Interestingly, the majority of late acting effectors are core effectors (Fig 7C). In general, HPE74 and HPE30 exhibited reproducible expression and were highly upregulated at one week while HPE2 and HPE8 were reproducibly downregulated at four weeks post-vector transmission (Fig 7C). These results demonstrate that over the course of infection the effector expression profile shifts, potentially enabling adaptation to new environments.

## DISCUSSION

VBDs significantly impact agricultural production and are important emerging diseases. Despite the importance of VBDs, scientists do not have a robust understanding of host manipulation regulated by vector-borne pathogens compared to foliar pathogens (Perilla-Henao and Casteel, 2016; Huang et al., 2020). Some of the most important bacterial vector-borne pathogens reside in the *Liberibacter* genus, including the

devastating citrus pathogen Las and the Solanaceous and Apiaceous pathogen Lso. Lso's ability to infect tomato makes this an attractive, more tractable system to investigate host manipulation by vector-borne pathogens. In this study we analyzed the identity, localization, defense suppression and expression of Lso haplotype A and B effectors. Our results show Lso effectors target diverse eukaryotic subcellular compartments, are capable of moving cell-to-cell and exhibit complex expression patterns in vector and host. The hypothesis that Lso effectors are predominantly capable of suppressing host immune responses was not supported, indicating that these effectors have novel targets, potentially related to VBD spread.

Vector born plant pathogens must exhibit high transcriptional flexibility in order to adapt to distinct organisms, insect and plant. Bacterial effector expression is known to be hierarchical, but there is little evidence of dynamic expression patterns during the course of plant bacterial infection (Mills et al., 2008; Lara-Tejero et al., 2011; Portaliou et al., 2017). Filamentous pathogens are known to express waves of effectors during infection. For example, the hemibiotrophic fungal pathogen *Colletotrichum higginsianum*, expresses specific sets of effectors during pre-penetration, biotrophic and necrotrophic infection stages (Kleemann et al., 2012). Similarly, we observed Lso effectors exhibit dynamic expression profiles in tomato, identifying sets of early and late expressed effectors (Fig 7C). The plant distribution and titer of Lso is patchy (Li et al., 2009a). If Lso effector expression is density dependent, this could explain the observed variability in effector expression across samples. Differences in effector expression were also observed between tomato and psyllid (Fig 7B), indicating that Lso utilizes its effector repertoire to adapt to diverse environments. Several Las effectors also show differential expression in host and vectors as well as different host genotypes, but dynamics during infection have not been studied (Yan et al., 2013; Pagliaccia et al., 2017; Clark et al., 2018; Liu et al., 2019). Our results suggest Lso requires a specific set of effectors to interact with the plant at different stages of the infection and core effectors, which are predominantly expressed during late stages of infection, most likely play a role in the development of the disease.

Lso SEC-effectors targeted several subcellular compartments that are absent in bacteria including the ER, peroxisomes, chloroplasts and nuclei (Fig 2,3 and 4); these compartments are known targets of plant pathogen effectors (Park et al., 2018b; Toruño et al., 2016). In addition, we found Lso effectors can move cell-to-cell (Fig 5), indicating they are capable of movement during infection. Effector mobility has been observed in other vascular (*Fusarium oxysporum* in tomato) and non-vascular (*Magnaporthe oryzae* in rice) pathosystems (Cao et al., 2018; Khang et al., 2010). Movement of effectors might be particularly important for Liberibacter species to thrive as they are restricted to the phloem. Similarly, multiple Phytoplasma SEC-dependent effectors are mobile, target transcription factors and influence disease symptomology and transmission (Tomkins et al., 2018). Lso HPE16 localizes to nuclear speckles (Fig 3C), a site of storage for RNA metabolism proteins, including transcription factors (Bazin et al., 2018). There are a few examples of effectors targeting this compartment, including PsAvh52, a *Phytophthora sojae* effector, that induces transcriptional reprogramming by recruiting a plant transacetylase to nuclear speckles (Li et al., 2018). Further characterization of the plant targets of mobile, nuclear localized effectors will reveal if targeting of transcription factors is a common mechanism for bacterial phloem-limited pathogens.

Plants rely on surface localized receptors to recognize pathogens including insects and are activated upon insect feed and salivary secretions in the apoplast. Phloem defense responses include the production of ROS, Ca<sup>2+</sup> influx, callose deposition and activation of proteins capable of occluding sieve elements (Huang et al., 2020). However, a detailed mechanistic understanding of phloem-mediated defense remains elusive. Watery saliva of aphids and leafhoppers contain effectors that suppress plant recognition, demonstrating the importance of plant immunity against VBD (Huang et al., 2020). Transcriptional profiling in tomato has revealed that Lso haplotype B infected plants exhibit downregulation of defense related genes during the initial stages of infection (Casteel et al., 2012; Huot et al., 2018). The nuclear effectors HPE16 and HPE19 as well as the nuclear-cytoplasmic effector HPE2 were successful at suppressing cytosolic Ca<sup>2+</sup> accumulation and/or ROS production (Fig 4E-F, Fig 6). Lso HPE1 was previously reported as a variable BAX-induced cell death and Prf



hypersensitive response suppressor (Levy et al., 2019). Plants infected with Lso usually contains high amounts of ROS and other defense related compounds (Wallis et al., 2012; Kumar et al., 2017), the fact that we could not find more effectors that consistently suppress ROS production upon perception of pathogen features could partially explain the high accumulation of these compounds. A secreted Las effector, SDE1, promotes plant defense suppression by targeting plant immune proteases in the phloem (Clark et al., 2018). Las SDE15 is a broad defense suppressor that inhibits HR induced by *Xanthomonas citri* pv *citri* in citrus (Pang et al., 2020). Although multiple Las effectors have been investigated, only two (SDE1 and SDE15) have been demonstrated to suppress plant immunity (Clark et al., 2018; Pang et al., 2020). Similarly, in this study we found the majority of Lso SEC dependent effectors fail to suppress early hallmarks of defense (Fig 6). These results suggest Liberibacter only requires a few effectors for defense suppression.

Extracellular bacteria must overcome a multilayered plant defense before being able to establish disease, therefore the majority of their effectors are involved in plant immunity suppression (Guo et al., 2009; Medina et al., 2018; Traore et al., 2019). In contrast, phloem-limited pathogens are deposited directly inside plant cells, escaping apoplastic defense. This protective intracellular niche could explain the low number of SEC-dependent effectors in Phytoplasmas and Liberibacters reported in plant defense suppression (Sugio et al., 2011b; Wang et al., 2018; Clark et al., 2018; Pang et al., 2020, this study). Other vector-borne pathogens manipulate their hosts for transmission. For example, the *Turnip mosaic virus* and *Potato virus Y* use NIaPro, a protease with dynamic vacuolar localization, to increase vector performance and suppresses aphid-induced callose deposition (Casteel et al., 2015; Bak et al., 2017). Because phloem limited pathogens cannot colonize a new host by themselves, it is likely Lso effectors play a role in modifying their environment and facilitating transmission.

In this study, we initiated the characterization of Lso effectors including their conservation, subcellular localization, expression profiles and ability to suppress early plant defense responses. Lso's interaction with Solanaceous plants, including tomato



and potato, is not only economically important but also represents a more tractable system to investigate VBD and unravel novel phloem specific defense strategies. This study sets the stage for future mechanistic investigation of Lso effector targets.

## METHODS

### Plant Materials and Growing Conditions

*Nicotiana benthamiana* wildtype and the transgenic line SRLJ15 expressing Aequorin (Segonzac et al., 2011) plants were grown in a controlled environment chamber at 26°C and 12h light/dark photoperiod with light intensity of 180  $\mu\text{E m}^{-2} \text{s}^{-1}$ . Tomato plants (*Solanum lycopersicum* cv Money Maker) were grown under controlled conditions at 26°C and 12h light/day photoperiod. *Bactericera cockerelli* psyllids carrying Lso haplotype B of the Western biotype were reared in tomato plants inside a 60 × 60 × 60-cm Bugdorm insect rearing cage (BioQuip Products, Rancho Dominguez, CA). All experiments were performed using synchronized colonies. To synchronize *B. cockerelli* colonies, 15-20 adult psyllids were collected from infected symptomatic or clean plants and transferred to healthy 5-week old tomato plants inside a 24.5 × 24.5 × 63-cm Bugdorm insect rearing cage (BioQuip Products, Rancho Dominguez, CA). 72h post-infestation, the adult psyllids were removed, and the plants were kept 21-26 days until new adults emerged.

### Effector Prediction

Lso genomes for haplotype A (JQIG01, JMTK01, JNVH01), B (CP002371.1) C (LVWB01, LVWE01), and D (LLVZ01) were used to predict secreted proteins with a signal peptide (SP), using SignalP v3.0 and SignalP v4.1 (Bendtsen et al., 2004; Petersen et al., 2011). Proteins larger than 35KDa and containing predicted transmembrane (TM) domains (TMHMM v2.0, Krogh et al., 2001) were removed. Effector conservation analyses were performed in pairwise comparisons using BLASTP and BLASTN (Gish et al., 1990). The threshold of percent similarity for presence/absence was 40%. The presence of eukaryotic nuclear localization signals was predicted using LOCALIZER (Sperschneider et al., 2017).

## Phylogenetic analysis

Orthologous genes of Lso isolates were predicted using the OrthoMCL v. 2.0 pipeline (Li et al., 2003). All-versus-all BLASTN comparison of all gene sequences for each species was performed, and orthologous genes were clustered by OrthoMCL v. 2.0. Multiple alignments of gene sequences were performed with PRANK v. 170,427 (Löytynoja, 2014). All the alignments were concatenated by FASconCAT v. 1.1, yielding a gene supermatrix (Kück and Meusemann, 2010). A maximum-likelihood approach was used to reconstruct the phylogenetic tree using RAxML v. 8.2 software (Stamatakis, 2014). The bootstrap was performed with 1,000 replicates. The resulting tree was visualized using FigTree v. 1.4.3 (Rambaut, 2012).

## Effector Cloning

To create N-terminal fusions with tGFP or C-terminal fusions with eGFP, we used the Golden Gate Toolkit for plants (Engler et al., 2014). Lso mature effectors (without signal peptide) were amplified from haplotype A and B infected tomatoes genomic DNA under standard PCR conditions using iProof (Biorad, Supplementary Table 1). Annealing temperatures of primer pairs were calculated using FastPCR (Kalendar et al., 2011). Amplicons of the expected size were purified and subcloned in the respective level zero acceptor for CDS1ns or CDS2 parts (Supplementary Table 3). Effector clones were confirmed by PCR and sequencing. To generate the fluorophore tagged fusions, confirmed effectors were cloned in the Golden Gate level 2 acceptor plasmid pICH86966 using a restriction-ligation reaction. To assess symplastic mobility of Lso effectors, a new Golden Gate vector (FP08018-BsaI) was engineered. The vector contains a constitutively expressed, cell-to-cell immobile, nuclear localized tdTomato (transformation control) as well as a 35S promoter-*lacZ* $\alpha$ -eGFP cassette. The *lacZ* $\alpha$  is flanked by BsaI recognition sites allowing PCR-amplified Lso effectors to be introduced with a Golden Gate reaction. The vector was produced using Golden Gate assembly of pre-existing basic parts (Engler et al., 2014) and newly created level 0 modules for

*lacZ* $\alpha$  and tdTomato. Control constructs containing nuclear localized tdTomato and a mobile eGFP (FP08024) or immobile 2XeGFP (FP08027) were also produced using Golden Gate assembly. Effector clones were confirmed by PCR, restriction digestion and sequencing. Final constructs were transformed in *Agrobacterium tumefaciens* GV3101. HPE19 was subcloned in the entry vector pENTR/SD/D-TOPO, following manufacturer instructions and cloned into the destination vector pTA7001(Li et al., 2013) using a Gateway LR reaction (Invitrogen). Sequences of destination vector inserts were confirmed and then transformed in *Agrobacterium tumefaciens* GV3101. All primers used for cloning are listed in Supplemental Table 2, plasmids are listed in Supplemental Table 3, and effectors are listed in Supplemental Table 1.

## Western blotting

To evaluate Lso effector expression, individual effectors were cloned at tGFP fusions and expressed in *N. benthamiana* using *Agrobacterium*-mediated transient expression. *A. tumefaciens* GV3101 carrying effectors was induced with 100  $\mu$ M acetosyringone for 1h and infiltrated at an OD<sub>600</sub> = 0.5. Total protein was isolated from *N. benthamiana* leaves 24h post-infiltration (hpi) by grinding in 2X Laemmli buffer (Laemmli, 1970). Protein samples were separated by SDS-PAGE and immunoblotting was conducted using anti-tGFP at a concentration of 1:10000 (Invitrogen), followed by secondary anti-rabbit-HRP at a concentration of 1:3000 (Biorad). Positive signals were detected via chemilumminiscence using the Super Signal West Femto Chemiluminescent Substrate (Pierce) and visualized using the Bio-Rad Chemidoc system.

## Confocal microscopy and effector mobility

*A. tumefaciens* GV3101 carrying effectors was induced with 100  $\mu$ M acetosyringone for 1h and infiltrated at an OD<sub>600</sub> = 0.5 into *N. benthamiana*. Imaging was performed at 24 hpi. Plasmolysis was performed using 1 M NaCl. Specific mCherry organelle markers for ER (ER-rk CD3-959), Golgi (G-rkCD3-967) and peroxisome (px-rk CD3-983) were

mixed in a 1:1 ratio with Lso tagged effectors, co-infiltrated in *N.benthamiana* and visualized 48hpi . All confocal microscopy was performed using a Leica SP8 confocal scope equipped with a 63X water objective. tGFP was excited at 488 nm, and the emission was gathered at 500 to 550 nm. mCherry was excited 550nm at and the emission gathered at 570 to 600. The chloroplast autofluorescence emission was gathered at 650 to 750 nm. Images were analyzed using the Leica Application Suite X (LAS X) software, 3D reconstructions were generated using the 3D visualization and analyses tools in the LAS X Core module.

For effector mobility assays, *A. tumefaciens* GV3101 carrying HPE1-eGFP, HPE8-eGFP, pF08024 (eGFP) and pF08027 (2xeGFP, Supplemental Table 3) were infiltrated at an  $OD_{600} = 0.0005$ . Imaging was performed at 48 hpi using a Leica SP8 confocal scope. eGFP was excited at 488 nm, and the emission was gathered at 495 to 540 nm. tdTomato was excited at 552 nm, and the emission was gathered at 561-616nm. Single transformation events were observed with a 20X objective in a Leica SP8 confocal scope.

### **ROS burst and cytosolic calcium accumulation assay**

*N. benthamiana* wildtype at the two leaf stage was inoculated with *Agrobacterium* strain GV3010 at an  $OD_{600} = 0.5$  containing the mature effector side by side with the control *Agrobacterium* strain GV3010 containing an empty vector (EV). For ROS, Leaf discs were excised with a #1 punch at 24 hpi and incubated overnight in water. Before measurement, the water was removed and 100  $\mu$ L of assay solution (17 mM luminol, 1  $\mu$ M horseradish peroxidase, and 100 nM flg22 [u1959ek130 Genescript] or 100  $\mu$ g  $mL^{-1}$  chitin hexamers(O-ch16 Megazyme)) was added to each well. Transient increase of cytosolic  $Ca^{2+}$  concentration was monitored in the *N. benthamiana* SLJR15 line (Segonzac et al., 2011). Leaf discs were excised at 24 hpi and incubated overnight in 1  $\mu$ M native coelenterazin (Sigma). Before measurement, the solution was removed and 100  $\mu$ L of assay solution (100 nM flg22 or 100  $\mu$ g  $mL^{-1}$  chitin) was added to each well.

Luminescence was measured using a TriStar Luminometer. Experiments included three biological replicates (individual plants) and were repeated three times  $n = 9$  plants. Statistical differences in ROS production or calcium accumulation were detected using multiple Mann-Whitney tests. Multiplicity adjusted P values from the Holm-Sidak method were used to compute adjusted P values. \* $p < 0.05$ , \*\* $p < 0.005$ , \*\*\* $p < 0.0005$ , \*\*\*\* $p < 0.00005$ . Outliers were detected by the ROUT method and removed from the analyses.

### **Time-Course Expression Analyses of Lso effectors in tomato and psyllid**

Three week-old tomato *Solanum lycopersicum* cv Money Maker were infected under controlled conditions with fifteen newly emerged psyllids from a synchronized Lso haplotype B colony. Psyllids were confined in a muslin bag, removed after 72h, flash-frozen in liquid nitrogen and stored at  $-80^{\circ}\text{C}$  until RNA extraction. The leaves were inspected and eggs (if present) were carefully removed using tape. Midvein samples (~50mg) were collected from the originally inoculated leaves at one or four-weeks post vector transmission. Six individual plants were included per experimental timepoint. Fifteen recovered psyllids were pooled for RNA extraction per infected plant. Total RNA was isolated using the TRIzol reagent (Invitrogen) following the manufacturer's instructions. To guarantee DNA removal, an additional cleaning step with acid phenol was added before precipitation of the RNA by adding an equal volume of Acid-Phenol:Chloroform 5:1 solution pH 4.5 (Ambion). Total RNA was quantified with a Nanodrop 2000 spectrophotometer (Thermo Scientific). The Lso titer for each sample was assessed using the RecA primers (Ibanez et al., 2014) and the three samples with the best Ct values for each timepoint were selected for further analysis.

iTaq Universal SyberGreen One-Step RT-qPCR kit (Biorad) was used to perform RT-qPCR following the manufacturer's protocol. 1ul of a 1:2 dilution of RNA (~100-250ng) was used per reaction. Effector expression was quantified on the CFX96 real-time PCR detection system (Bio-Rad). Gene expression was calculated using the  $\Delta\text{CT}$  method and normalized against the *GlnA* housekeeping gene. Primers were designed with

Primer3 (Untergasser et al., 2012) and provided in Supplementary Table 3. heatmap R package was used for plotting the histograms and perform hierarchical clustering (Kolde, 2012).

## **AUTHOR CONTRIBUTIONS**

RPA designed the research, performed research, analyzed data and wrote the paper; JZ performed effector mobility assays, AB generated constructs for effector mobility assays, SPT performed the phylogenetic analyses in Fig 1, CC helped design effector expression experiments, CF contributed new analytical tools for effector mobility assays, GC designed the research, analyzed data and wrote the paper. TT performed blind immune suppression assays with HPE16 and HPE2 to validate results. LPH performed initial Lso effector predictions. All authors reviewed and approved the final version of the manuscript.

## **SUPPLEMENTAL DATA**

Supplemental Figure 1. The majority of Lso effectors exhibit nuclear-cytoplasmic localization in *Nicotiana benthamiana*.

Supplemental Figure 2. Expression of Lso effectors expressed in *N. benthamiana*.

Supplemental Figure 3. Subcellular localization of HPE21 and HPE14.

Supplemental Figure 4. HPE19 induces morphological changes in nuclei.

Supplemental Figure 5. Complete microscopy panels for visualization of Lso effector movement in Figure 5.

Supplemental Data Set 1. Four Tables.

Supplemental Table 1. Predicted *Liberibacter solanacearum* effectors.

Supplemental Table 2. Primers used for cloning in this study.

Supplemental Table 3. Plasmids and Golden Gate components used in this study.

Supplemental Table 4. Primers used in this study to evaluate effector expression by qPCR.

Supplemental Video 1. HPE16 is present in fast-moving punctate bodies in the nucleus.

## **FUNDING**

This material is based upon work supported by the National Institutes of Health under Grant No. R35GM136402 and the United States Department of Agriculture's National Institute of Food and Agriculture under Grant No. 2019-70016-2979 awarded to GC. PR and LPH were supported by a Colciencias-Fulbright Fellowship. CF and AB were supported by grants from the Biotechnology and Biological Research Council (BBS/E/J/000PR9796) and European Research Council (725459, "INTERCELLAR"). CC was supported by startup funds from UC Davis and a National Science Foundation Grant No. 1723926.

## REFERENCES

- Achor, D., Welker, S., Ben-Mahmoud, S., Wang, C., Folimonova, S.Y., Dutt, M., Gowda, S., and Levy, A.** (2020). Dynamics of *Candidatus Liberibacter asiaticus* Movement and Sieve-Pore Plugging in Citrus Sink Cells<sup>1</sup>. *Plant Physiol.* **182**: 882–891.
- Bak, A., Cheung, A.L., Yang, C., Whitham, S.A., and Casteel, C.L.** (2017). A viral protease relocalizes in the presence of the vector to promote vector performance. *Nat. Commun.* **8**: 14493.
- Bazin, J., Romero, N., Rigo, R., Charon, C., Blein, T., Ariel, F., and Crespi, M.** (2018). Nuclear Speckle RNA Binding Proteins Remodel Alternative Splicing and the Non-coding Arabidopsis Transcriptome to Regulate a Cross-Talk Between Auxin and Immune Responses. *Front. Plant Sci.* **9**: 1209.
- Bendtsen, J.D., Nielsen, H., Von Heijne, G., and Brunak, S.** (2004). Improved prediction of signal peptides: SignalP 3.0. *J. Mol. Biol.* **340**: 783–795.
- Benz, R.** (2020). RTX-Toxins. *Toxins (Basel)*. **12**: 359.
- Cao, L., Blekemolen, M.C., Tintor, N., Cornelissen, B.J.C., and Takken, F.L.W.** (2018). The *Fusarium oxysporum* Avr2-Six5 Effector Pair Alters Plasmodesmatal Exclusion Selectivity to Facilitate Cell-to-Cell Movement of Avr2. *Mol. Plant* **11**: 691–705.
- Casteel, C.L., De Alwis, M., Bak, A., Dong, H., Whitham, S.A., and Jander, G.** (2015). Disruption of Ethylene Responses by Turnip mosaic virus Mediates Suppression of Plant Defense against the Green Peach Aphid Vector. *Plant Physiol.* **169**: 209–218.
- Casteel, C.L., Hansen, A.K., Walling, L.L., and Paine, T.D.** (2012). Manipulation of plant defense responses by the tomato psyllid (*Bactericerca cockerelli*) and its associated endosymbiont *Candidatus Liberibacter psyllae*. *PLoS One* **7**: e35191.
- Chaudhary, R., Atamian, H.S., Shen, Z., Briggs, S.P., and Kaloshian, I.** (2014). GroEL from the endosymbiont *Buchnera aphidicola* betrays the aphid by triggering plant defense. *Proc. Natl. Acad. Sci. U. S. A.* **111**: 8919–8924.



- Chávez, E.C., Bautista, O.H., Flores, J.L., Uribe, L.A., and Fuentes, Y.M.O.** (2015). Insecticide-Resistance Ratios of Three Populations of *Bactericera cockerelli* (Hemiptera: Psylloidea: Triozidae) in Regions of Northern Mexico . *Florida Entomol.* **98**: 950–953.
- Clark, K. et al.** (2018). An effector from the Huanglongbing-associated pathogen targets citrus proteases. *Nat. Commun.* **9**: 1718.
- Clark, K.J., Pang, Z., Trinh, J., Wang, N., and Ma, W.** (2020). Sec-Delivered Effector 1 (SDE1) of ‘Candidatus *Liberibacter asiaticus*’ Promotes Citrus Huanglongbing. *Mol. Plant-Microbe Interact.* **33**: 1394–1404.
- Dennison, C.** (2013). Cupredoxins BT - Encyclopedia of Biophysics. In G.C.K. Roberts, ed (Springer Berlin Heidelberg: Berlin, Heidelberg), pp. 404–406.
- Dermastia, M.** (2019). Plant Hormones in Phytoplasma Infected Plants . *Front. Plant Sci.* **10**: 477.
- Deutsch, C.A., Tewksbury, J.J., Tigchelaar, M., Battisti, D.S., Merrill, S.C., Huey, R.B., and Naylor, R.L.** (2018). Increase in crop losses to insect pests in a warming climate. *Science* (80-. ). **361**: 916–919.
- Ding, X., Jimenez-Gongora, T., Krenz, B., and Lozano-Duran, R.** (2019). Chloroplast clustering around the nucleus is a general response to pathogen perception in *Nicotiana benthamiana*. *Mol. Plant Pathol.* **20**: 1298–1306.
- Engler, C., Youles, M., Gruetzner, R., Ehnert, T.-M., Werner, S., Jones, J.D.G., Patron, N.J., and Marillonnet, S.** (2014). A Golden Gate Modular Cloning Toolbox for Plants. *ACS Synth. Biol.* **3**: 839–843.
- Etxeberria, E., Gonzalez, P., Achor, D., and Albrigo, G.** (2009). Anatomical distribution of abnormally high levels of starch in HLB-affected Valencia orange trees. *Physiol. Mol. Plant Pathol.* **74**: 76–83.
- Gaupels, F., Durner, J., and Kogel, K.-H.** (2017). Production, amplification and systemic propagation of redox messengers in plants? The phloem can do it all! *New Phytol.* **214**: 554–560.
- Gilkes, J.M., Frampton, R.A., Smith, G.R., and Dobson, R.C.J.** (2018). Potential pathogenicity determinants in the genome of ‘Candidatus *Liberibacter solanacearum*’, the causal agent of zebra chip disease of potato. *Australas. Plant*

Pathol. **47**: 119–134.

- Gimenez-Ibanez, S., Hann, D.R., Chang, J.H., Segonzac, C., Boller, T., and Rathjen, J.P.** (2018). Differential Suppression of *Nicotiana benthamiana* Innate Immune Responses by Transiently Expressed *Pseudomonas syringae* Type III Effectors. *Front. Plant Sci.* **9**: 688.
- Gish, W., Altschul, S.F., Lipman, D.J., Miller, W., and Myers, E.W.** (1990). Basic local alignment search tool. *J. Mol. Biol.* **215**: 403–10.
- Granato, L.M., Galdeano, D.M., D’Alessandre, N.D.R., Breton, M.C., and Machado, M.A.** (2019). Callose synthase family genes plays an important role in the Citrus defense response to *Candidatus Liberibacter asiaticus*. *Eur. J. Plant Pathol.* **155**: 25–38.
- Guo, M., Tian, F., Wamboldt, Y., and Alfano, J.R.** (2009). The majority of the type III effector inventory of *Pseudomonas syringae* pv. tomato DC3000 can suppress plant immunity. *Mol. Plant. Microbe. Interact.* **22**: 1069–1080.
- Hartung, J.S., Paul, C., Achor, D., and Brlansky, R.H.** (2010). Colonization of dodder, *Cuscuta indecora*, by “*Candidatus Liberibacter asiaticus*” and “*Ca. L. americanus*.” *Phytopathology* **100**: 756–762.
- Huang, C.Y., Niu, D., Kund, G., Jones, M., Albrecht, U., Nguyen, L., Bui, C., Ramadugu, C., Bowman, K.D., Trumble, J., and Jin, H.** (2021). Identification of citrus immune regulators involved in defence against Huanglongbing using a new functional screening system. *Plant Biotechnol. J.* **19**: 757–766.
- Huang, W., Reyes-Caldas, P., Mann, M., Seifbarghi, S., Kahn, A., Almeida, R.P.P., Béven, L., Heck, M., Hogenhout, S.A., and Coaker, G.** (2020). Bacterial Vector-Borne Plant Diseases: Unanswered Questions and Future Directions. *Mol. Plant* **13**: 1379–1393.
- Huot, O.B., Levy, J.G., and Tamborindeguy, C.** (2018). Global gene regulation in tomato plant (*Solanum lycopersicum*) responding to vector (*Bactericera cockerelli*) feeding and pathogen (*Candidatus Liberibacter solanacearum*) infection. *Plant Mol. Biol.* **97**: 57–72.
- Ibanez, F., Levy, J., and Tamborindeguy, C.** (2014). Transcriptome Analysis of “*Candidatus Liberibacter solanacearum*” in Its Psyllid Vector, *Bactericera cockerelli*.

PLoS One **9**: e100955.

- Jain, M., Munoz-Bodnar, A., Zhang, S., and Gabriel, D.W.** (2018). A Secreted 'Candidatus Liberibacter asiaticus' Peroxiredoxin Simultaneously Suppresses Both Localized and Systemic Innate Immune Responses In Planta. *Mol. Plant-Microbe Interact.* **31**: 1312–1322.
- Jaouannet, M., Rodriguez, P.A., Thorpe, P., Lenoir, C.J.G., MacLeod, R., Escudero-Martinez, C., and Bos, J.I.B.** (2014). Plant immunity in plant-aphid interactions. *Front. Plant Sci.* **5**: 663.
- Kalendar, R., Lee, D., and Schulman, A.H.** (2011). Java web tools for PCR, in silico PCR, and oligonucleotide assembly and analysis. *Genomics* **98**: 137–144.
- Khang, C.H., Berruyer, R., Giraldo, M.C., Kankanala, P., Park, S.-Y., Czymmek, K., Kang, S., and Valent, B.** (2010). Translocation of *Magnaporthe oryzae* Effectors into Rice Cells and Their Subsequent Cell-to-Cell Movement . *Plant Cell* **22**: 1388–1403.
- Kleemann, J., Rincon-Rivera, L.J., Takahara, H., Neumann, U., van Themaat, E.V.L., van der Does, H.C., Hacquard, S., Stüber, K., Will, I., Schmalenbach, W., Schmelzer, E., and O'Connell, R.J.** (2012). Sequential Delivery of Host-Induced Virulence Effectors by Appressoria and Intracellular Hyphae of the Phytopathogen *Colletotrichum higginsianum*. *PLOS Pathog.* **8**: e1002643.
- Koh, E.-J., Zhou, L., Williams, D.S., Park, J., Ding, N., Duan, Y.-P., and Kang, B.-H.** (2012). Callose deposition in the phloem plasmodesmata and inhibition of phloem transport in citrus leaves infected with "Candidatus Liberibacter asiaticus." *Protoplasma* **249**: 687–697.
- Kolde, R.** (2012). pheatmap: Pretty heatmaps.
- Krenz, B., Jeske, H., and Kleinow, T.** (2012). The induction of stomule formation by a plant DNA-virus in epidermal leaf tissues suggests a novel intra- and intercellular macromolecular trafficking route. *Front. Plant Sci.* **3**: 291.
- Krogh, A., Larsson, B., Von Heijne, G., and Sonnhammer, E.L.L.** (2001). Predicting transmembrane protein topology with a hidden Markov model: Application to complete genomes. *J. Mol. Biol.* **305**: 567–580.
- Kück, P. and Meusemann, K.** (2010). FASconCAT: Convenient handling of data

- matrices. *Mol. Phylogenet. Evol.* **56**: 1115–1118.
- Kumar, G.N.M., Knowles, L.O., and Knowles, N.R.** (2017). Zebra chip disease enhances respiration and oxidative stress of potato tubers (*Solanum tuberosum* L.). *Planta* **246**: 625–639.
- Laemmli, U.K.** (1970). Cleavage of Structural Proteins during the Assembly of the Head of Bacteriophage T4. *Nature* **227**: 680–685.
- Lara-Tejero, M., Kato, J., Wagner, S., Liu, X., and Galán, J.E.** (2011). A Sorting Platform Determines the Order of Protein Secretion in Bacterial Type III Systems. *Science* (80-. ). **331**: 1188–1191.
- Levy, J.G., Gross, R., Mendoza-Herrera, A., Tang, X., Babilonia, K., Shan, L., Kuhl, J.C., Dibble, M.S., Xiao, F., and Tamborindeguy, C.** (2019). Lso-HPE1, an Effector of ‘*Candidatus Liberibacter solanacearum*’, Can Repress Plant Immune Response. *Phytopathology* **110**: 648–655.
- Li, H. et al.** (2018). A *Phytophthora* effector recruits a host cytoplasmic transacetylase into nuclear speckles to enhance plant susceptibility. *Elife* **7**: e40039.
- Li, L., Stoeckert Jr, C.J., and Roos, D.S.** (2003). OrthoMCL: identification of ortholog groups for eukaryotic genomes. *Genome Res.* **13**: 2178–2189.
- Li, W., Abad, J.A., French-Monar, R.D., Rascoe, J., Wen, A., Gudmestad, N.C., Secor, G.A., Lee, I.-M., Duan, Y., and Levy, L.** (2009a). Multiplex real-time PCR for detection, identification and quantification of ‘*Candidatus Liberibacter solanacearum*’ in potato plants with zebra chip. *J. Microbiol. Methods* **78**: 59–65.
- Li, W., Chiang, Y.-H., and Coaker, G.** (2013). The HopQ1 Effector’s Nucleoside Hydrolase-Like Domain Is Required for Bacterial Virulence in *Arabidopsis* and Tomato, but Not Host Recognition in Tobacco. *PLoS One* **8**: e59684.
- Li, W., Levy, L., and Hartung, J.S.** (2009b). Quantitative Distribution of ‘*Candidatus Liberibacter asiaticus*’ in Citrus Plants with Citrus Huanglongbing. *Phytopathology* **99**: 139–144.
- Lin, H. and Civerolo, E.L.** (2014). Comparative Genomics of the Liberibacterial Plant Pathogens. In *Genomics of Plant-Associated Bacteria*, D. Gross, A. Lichens-Park, and C. Kole, eds (Springer: Berlin, Heidelberg), pp. 203–233.
- Lin, H., Lou, B., Glynn, J.M., Doddapaneni, H., Civerolo, E.L., Chen, C., Duan, Y.,**

- Zhou, L., and Vahling, C.M.** (2011). The complete genome sequence of “*Candidatus Liberibacter solanacearum*”, the bacterium associated with potato Zebra Chip disease. *PLoS One* **6**: e19135.
- Liu, X., Fan, Y., Zhang, C., Dai, M., Wang, X., and Li, W.** (2019). Nuclear Import of a Secreted “*Candidatus Liberibacter asiaticus*” Protein is Temperature Dependent and Contributes to Pathogenicity in *Nicotiana benthamiana*. *Front. Microbiol.* **10**: 1684.
- Löytynoja, A.** (2014). Phylogeny-aware alignment with PRANK BT - Multiple Sequence Alignment Methods. In D.J. Russell, ed (Humana Press: Totowa, NJ), pp. 155–170.
- Medina, C.A., Reyes, P.A., Trujillo, C.A., Gonzalez, J.L., Bejarano, D.A., Montenegro, N.A., Jacobs, J.M., Joe, A., Restrepo, S., Alfano, J.R., and Bernal, A.** (2018). The role of type III effectors from *Xanthomonas axonopodis* pv. *manihotis* in virulence and suppression of plant immunity. *Mol. Plant Pathol.* **19**: 593–606.
- Mendoza-Herrera, A., Levy, J., Harrison, K., Yao, J., Ibanez, F., and Tamborindeguy, C.** (2018). Infection by *Candidatus Liberibacter solanacearum*’ haplotypes A and B in *Solanum lycopersicum* ‘Moneymaker.’ *Plant Dis.* **102**: 2009–2015.
- Mills, E., Baruch, K., Charpentier, X., Kobi, S., and Rosenshine, I.** (2008). Real-Time Analysis of Effector Translocation by the Type III Secretion System of Enteropathogenic *Escherichia coli*. *Cell Host Microbe* **3**: 104–113.
- Ning, W., Jiang, P., Guo, Y., Wang, C., Tan, X., Zhang, W., Peng, D., and Xue, Y.** (2021). GPS-Palm: a deep learning-based graphic presentation system for the prediction of S-palmitoylation sites in proteins. *Brief. Bioinform.* **22**: 1836–1847.
- Pagliaccia, D. et al.** (2017). A pathogen secreted protein as a detection marker for citrus huanglongbing. *Front. Microbiol.* **8**: 2041.
- Pang, Z., Zhang, L., Coaker, G., Ma, W., He, S.-Y., and Wang, N.** (2020). Citrus CsACD2 Is a Target of *Candidatus Liberibacter Asiaticus* in Huanglongbing Disease . *Plant Physiol.* **184**: 792–805.
- Park, E., Caplan, J.L., and Dinesh-Kumar, S.P.** (2018a). Dynamic coordination of

- plastid morphological change by cytoskeleton for chloroplast-nucleus communication during plant immune responses. *Plant Signal. Behav.* **13**: e1500064.
- Park, E., Nedo, A., Caplan, J.L., and Dinesh-Kumar, S.P.** (2018b). Plant–microbe interactions: organelles and the cytoskeleton in action. *New Phytol.* **217**: 1012–1028.
- Perilla-Henao, L.M. and Casteel, C.L.** (2016). Vector-borne bacterial plant pathogens: Interactions with hemipteran insects and plants. *Front. Plant Sci.* **7**: 1163.
- Petersen, T.N., Brunak, S., Von Heijne, G., and Nielsen, H.** (2011). SignalP 4.0: Discriminating signal peptides from transmembrane regions. *Nat. Methods* **8**: 785–786.
- Portaliou, A.G., Tsolis, K.C., Loos, M.S., Balabanidou, V., Rayo, J., Tsirigotaki, A., Crepin, V.F., Frankel, G., Kalodimos, C.G., Karamanou, S., and Economou, A.** (2017). Hierarchical protein targeting and secretion is controlled by an affinity switch in the type III secretion system of enteropathogenic *Escherichia coli*. *EMBO J.* **36**: 3517–3531.
- Prasad, S., Xu, J., Zhang, Y., and Wang, N.** (2016). SEC-translocon dependent extracytoplasmic proteins of *Candidatus liberibacter asiaticus*. *Front. Microbiol.* **7**.
- Rambaut, A.** (2012). FigTree.
- Reddy, A.S.N., Day, I.S., Göhring, J., and Barta, A.** (2012). Localization and Dynamics of Nuclear Speckles in Plants. *Plant Physiol.* **158**: 67–77.
- Secor, G.A., Rivera, V. V., Abad, J.A., Lee, I.-M., Clover, G.R.G., Liefing, L.W., Li, X., and De Boer, S.H.** (2009). Association of ‘*Candidatus Liberibacter solanacearum*’ with Zebra Chip Disease of Potato Established by Graft and Psyllid Transmission, Electron Microscopy, and PCR. *Plant Dis.* **93**: 574–583.
- Segonzac, C., Feike, D., Gimenez-Ibanez, S., Hann, D.R., Zipfel, C., and Rathjen, J.P.** (2011). Hierarchy and Roles of Pathogen-Associated Molecular Pattern-Induced Responses in *Nicotiana benthamiana*. *Plant Physiol.* **156**: 687–699.
- Shagin, D.A. et al.** (2004). GFP-like Proteins as Ubiquitous Metazoan Superfamily: Evolution of Functional Features and Structural Complexity. *Mol. Biol. Evol.* **21**: 841–850.

- Singerman, A. and Rogers, M.E.** (2020). The Economic Challenges of Dealing with Citrus Greening: The Case of Florida. *J. Integr. Pest Manag.* **11**: 3.
- Singh, A., Kumar, N., Tomar, P.P.S., Bhose, S., Ghosh, D.K., Roy, P., and Sharma, A.K.** (2017). Characterization of a bacterioferritin comigratory protein family 1-Cys peroxiredoxin from *Candidatus Liberibacter asiaticus*. *Protoplasma* **254**: 1675–1691.
- Sperschneider, J., Catanzariti, A.-M., DeBoer, K., Petre, B., Gardiner, D.M., Singh, K.B., Dodds, P.N., and Taylor, J.M.** (2017). LOCALIZER: subcellular localization prediction of both plant and effector proteins in the plant cell. *Sci. Rep.* **7**: 44598.
- Stamatakis, A.** (2014). RAxML version 8: a tool for phylogenetic analysis and post-analysis of large phylogenies. *Bioinformatics* **30**: 1312–1313.
- Sugio, A., Kingdom, H.N., MacLean, A.M., Grieve, V.M., and Hogenhout, S.A.** (2011). Phytoplasma protein effector SAP11 enhances insect vector reproduction by manipulating plant development and defense hormone biosynthesis. *Proc. Natl. Acad. Sci.* **108**: e1254–e1263.
- Sumner-Kalkun, J.C., Hight, F., Arnsdorf, Y.M., Back, E., Carnegie, M., Madden, S., Carboni, S., Billaud, W., Lawrence, Z., and Kenyon, D.** (2020). ‘*Candidatus Liberibacter solanacearum*’ distribution and diversity in Scotland and the characterisation of novel haplotypes from *Craspedolepta* spp. (Psyllidae: Aphalaridae). *Sci. Rep.* **10**: 16567.
- Szczepaniec, A., Varela, K.A., Kiani, M., Paetzold, L., and Rush, C.M.** (2019). Incidence of resistance to neonicotinoid insecticides in *Bactericera cockerelli* across Southwest U.S. *Crop Prot.* **116**: 188–195.
- Tan, C.M. et al.** (2016). Phytoplasma SAP11 alters 3-isobutyl-2-methoxypyrazine biosynthesis in *Nicotiana benthamiana* by suppressing NbOMT1. *J. Exp. Bot.* **67**: 4415–4425.
- Thapa, S.P., De Francesco, A., Trinh, J., Gurung, F.B., Pang, Z., Vidalakis, G., Wang, N., Ancona, V., Ma, W., and Coaker, G.** (2020). Genome-wide analyses of *Liberibacter* species provides insights into evolution, phylogenetic relationships, and virulence factors. *Mol. Plant Pathol.* **21**: 716–731.
- Thompson, S.M., Johnson, C.P., Lu, A.Y., Frampton, R.A., Sullivan, K.L., Fiers,**



- M.W.E.J., Crowhurst, R.N., Pitman, A.R., Scott, I.A.W., Wen, A., Gudmestad, N.C., and Smith, G.R.** (2015). Genomes of ‘Candidatus Liberibacter solanacearum’ Haplotype A from New Zealand and the United States Suggest Significant Genome Plasticity in the Species. *Phytopathology* **105**: 863–871.
- Tomkins, M., Kliot, A., Marée, A.F., and Hogenhout, S.A.** (2018). A multi-layered mechanistic modelling approach to understand how effector genes extend beyond phytoplasma to modulate plant hosts, insect vectors and the environment. *Curr. Opin. Plant Biol.* **44**: 39–48.
- Toruño, T.Y., Stergiopoulos, I., and Coaker, G.** (2016). Plant-Pathogen Effectors: Cellular Probes Interfering with Plant Defenses in Spatial and Temporal Manners. *Annu. Rev. Phytopathol.* **54**: 419–441.
- Traore, S.M., Eckshtain-Levi, N., Miao, J., Castro Sparks, A., Wang, Z., Wang, K., Li, Q., Burdman, S., Walcott, R., Welbaum, G.E., and Zhao, B.** (2019). Nicotiana species as surrogate host for studying the pathogenicity of *Acidovorax citrulli*, the causal agent of bacterial fruit blotch of cucurbits. *Mol. Plant Pathol.* **20**: 800–814.
- Untergasser, A., Cutcutache, I., Koressaar, T., Ye, J., Faircloth, B.C., Remm, M., and Rozen, S.G.** (2012). Primer3—new capabilities and interfaces. *Nucleic Acids Res.* **40**: e115–e115.
- Wallis, C.M., Chen, J., and Civerolo, E.L.** (2012). Zebra chip-diseased potato tubers are characterized by increased levels of host phenolics, amino acids, and defense-related proteins. *Physiol. Mol. Plant Pathol.* **78**: 66–72.
- Wang, J., Haapalainen, M., Schott, T., Thompson, S.M., Smith, G.R., Nissinen, A.I., and Pirhonen, M.** (2017). Genomic sequence of “Candidatus Liberibacter solanacearum” haplotype C and its comparison with haplotype A and B genomes. *PLoS One* **12**: e0171531.
- Wang, N., Li, Y., Chen, W., Yang, H.Z., Zhang, P.H., and Wu, Y.F.** (2018). Identification of wheat blue dwarf phytoplasma effectors targeting plant proliferation and defence responses. *Plant Pathol.* **67**: 603–609.
- Wen, A., Johnson, C., and Gudmestad, N.C.** (2013). Development of a PCR Assay for the Rapid Detection and Differentiation of ‘Candidatus Liberibacter solanacearum’ Haplotypes and Their Spatiotemporal Distribution in the United



States. *Am. J. Potato Res.* **90**: 229–236.

**Yan, Q., Sreedharan, A., Wei, S., Wang, J., Pelz-Stelinski, K., Folimonova, S., and Wang, N.** (2013). Global gene expression changes in *Candidatus Liberibacter asiaticus* during the transmission in distinct hosts between plant and insect. *Mol. Plant Pathol.* **14**: 391–404.

**Zheng, Z., Clark, N., Keremane, M., Lee, R., Wallis, C., Deng, X., and Chen, J.** (2014). Whole-Genome Sequence of “*Candidatus Liberibacter solanacearum*” Strain R1 from California. *Genome Announc.* **2**: e01353-14.

## FIGURES AND LEGENDS

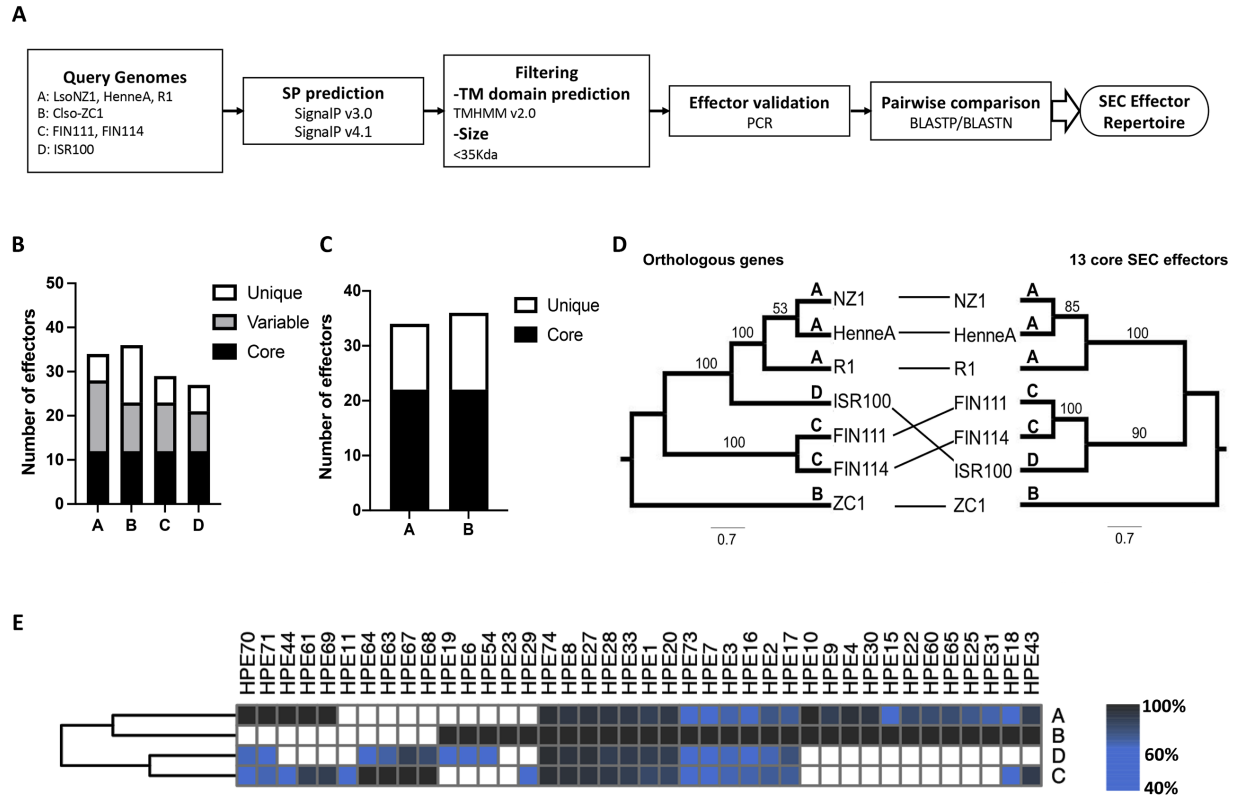

**Figure 1. Prediction and classification of Lso SEC-dependent effectors.** **A.** Pipeline used to predict the Lso effector repertoire. Lso genomes for haplotype A (JQIG01, JMTK01, JNVH01), B (CP002371.1) C (LVWB01, LVWE01), and D (LLVZ01) were used to predict secreted proteins with a signal peptide (SP). Proteins larger than 35KDa and containing predicted transmembrane (TM) domains were removed. Effectors were PCR validated in haplotype A (LsoNZ1) and B (CLso\_NZ1). **B.** Lso effectors were classified into three categories: those present in all haplotypes (core), those shared only with one or two haplotypes (variable) and those unique to each haplotype. **C.** Effector repertoire comparison across multiple strains of haplotypes A and B. The criteria and genomes utilized are the same as in B. **D.** Left: Lso phylogeny based on 815 orthologous genes. Right: Lso phylogeny based on the 13 core effectors. A maximum likelihood approach was used to generate each phylogeny with 1000 bootstrap replicates. Bootstrap values are indicated at each node. **E.** Presence/Absence hierarchical clustered heatmap of effectors found in at least two haplotypes. Colors represent percent amino acid identity across rows. Haplotypes are shown to the right.

**A**

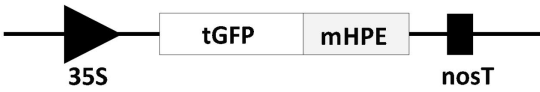

**B**

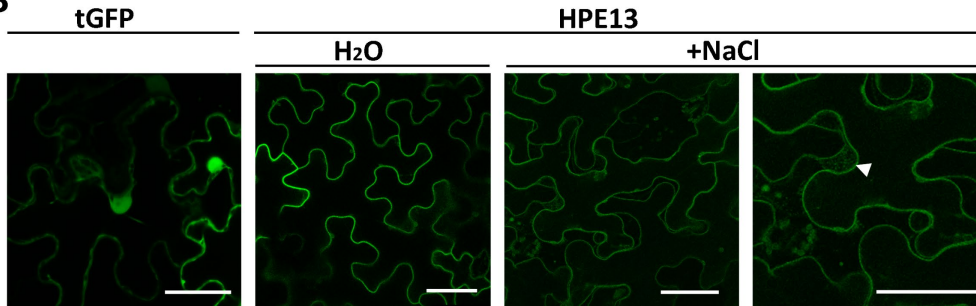

**C**

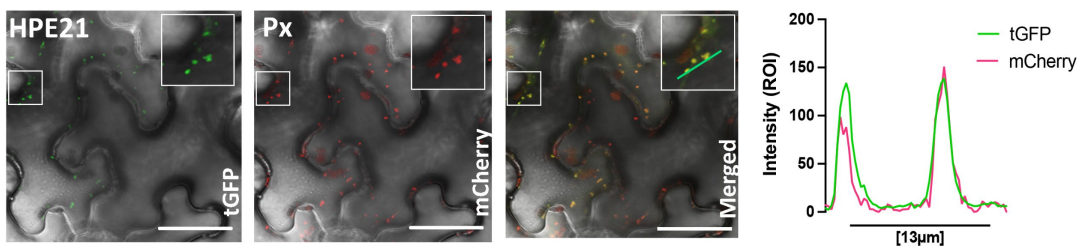

**D**

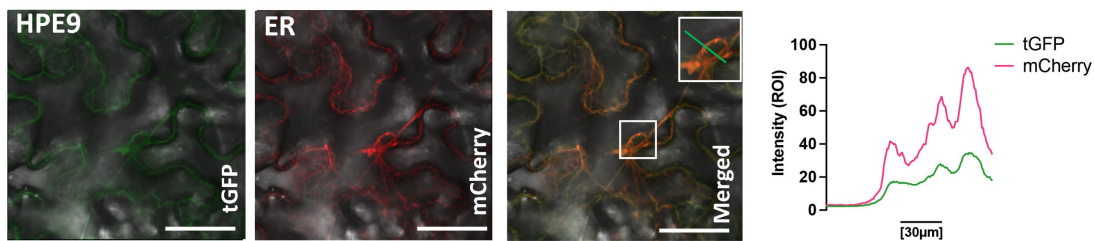

**Figure 2. Lso effectors localize to specific plant subcellular compartments. A.**

Mature effectors (mEffector) lacking their N-terminal signal peptide were cloned with an N-terminal fusion to TurboGFP (tGFP) and visualized by confocal microscopy 24h after transient expression in *N. benthamiana*. **B.** tGFP-HPE13 localizes to the plasma membrane. Leaves expressing HPE13 were subjected to plasmolysis with 1 M NaCl for 30 min, arrow indicated Hechtian strands. Leaves infiltrated with water were used as a control **C.** tGFP-HPE21(left) was co-infiltrated with 1-PTS1 peroxisomal-targeted mCherry (center). Inset in the right panel is a close-up of the colocalization of tGFP-HPE21 with peroxisomes in the merged image. Right panel shows the intensity profile for the green line in the merged image. **D.** tGFP-HPE9 was co-expressed with a SP-mCherry-HDEL labeling the ER. Inset in the right panel is a close-up of the colocalization of tGFP-HPE9 with the ER in the merged image. Right panel shows the intensity profile for the green line in the merged image. Bars= 50μm.

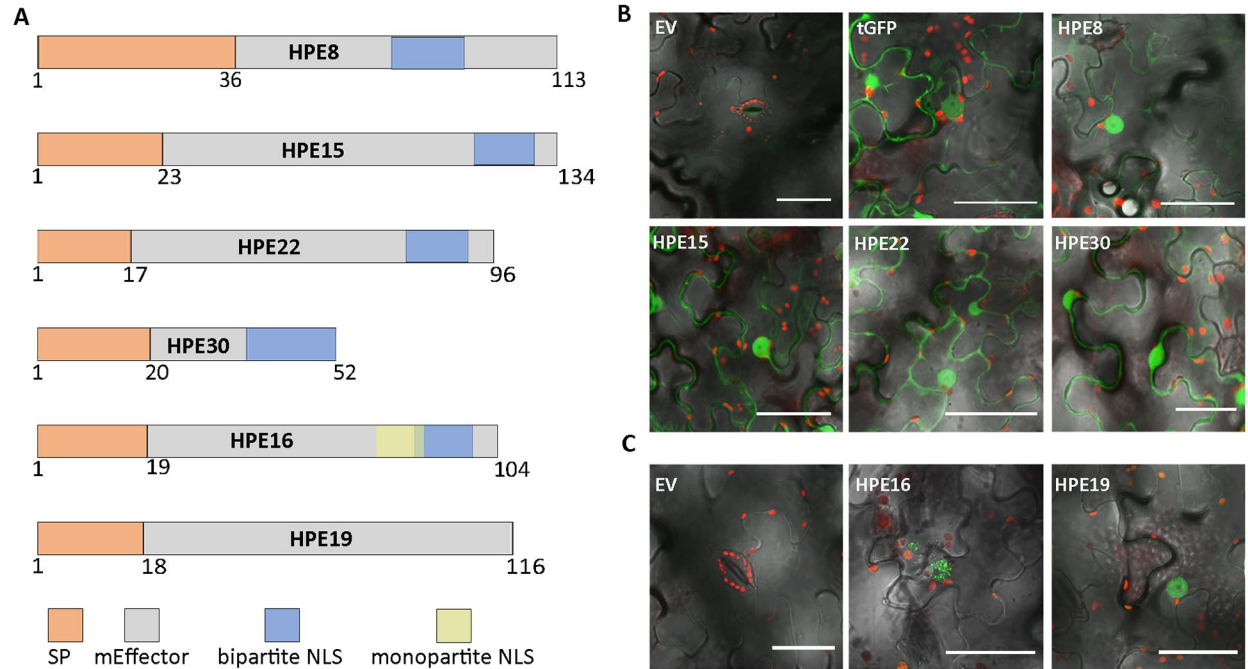

**Figure 3. Multiple Lso effectors localize to the nucleus and cytoplasm *in planta*.** Mature effectors (mEffector) lacking their N-terminal signal peptide were cloned with an N-terminal fusion to TurboGFP (tGFP) and visualized by confocal microscopy 24h after transient expression in *N. benthamiana*. **A.** Schematic representation of Lso-effectors including predicted nuclear localization signals (NLS). **B.** The majority of Lso effectors exhibited a nuclear and cytoplasmic localization (16 out of 23 tested, see Fig S1). **C.** HPE16 and HPE19 exhibit nuclear localization. Bars: 50 $\mu$ m

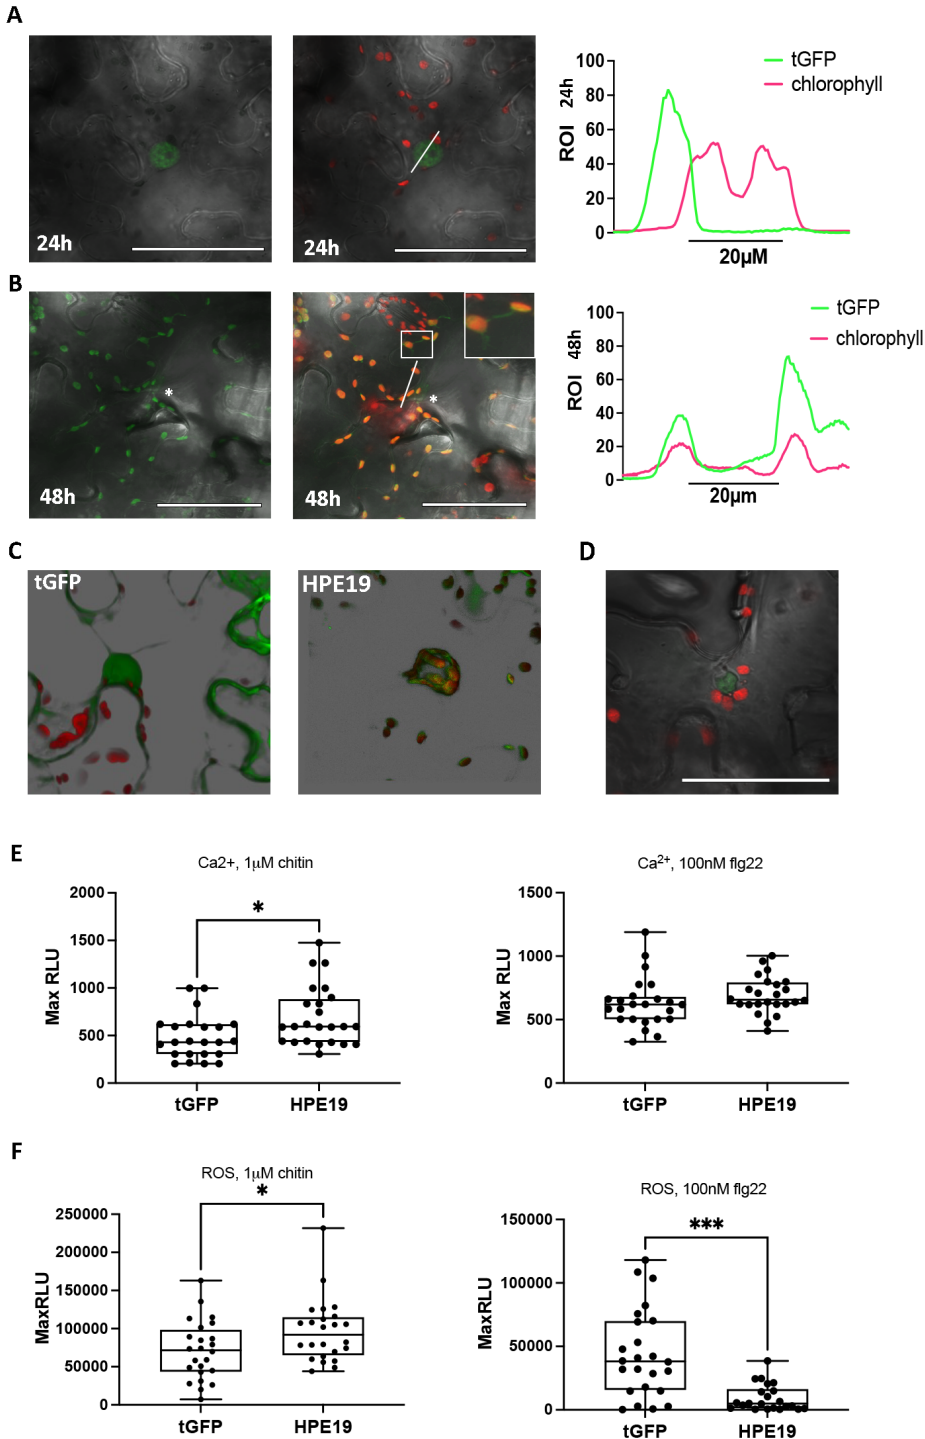

**Figure 4. HPE19 exhibits dynamic nuclear chloroplast localization and alters immune responses in *Nicotiana benthamiana*.** **A-D.** HPE19 lacking its signal peptide was cloned with an N-terminal fusion to TurboGFP (tGFP) under control of a dexamethasone (dex) inducible promoter, transiently expressed in *N. benthamiana*, and visualized by confocal microscopy. Dex was applied 12hpi **A**. HPE19 exhibits nuclear expression at 24hpi. Left panel shows GFP fluorescence, central panel includes

chloroplast autofluorescence and right panel shows the intensity profile for tGFP and chlorophyll in the merged image. **B.** HPE19 primarily exhibits chloroplast localization at 48hpi. Insert in the central panel shows chloroplast stromule-like projections. Right panel, tGFP and chlorophyll intensity profiles overlap. in the merged image. **C.** 3D reconstructions of the tGFP control and HPE19 T 48hpi illustrate chloroplast clustering around nuclei. 3D reconstructions were generated from 20 images. **D.** Representative image of chloroplasts surrounding a misshapen nucleus carrying HPE19. **E.** tGFP-HPE19 was transiently expressed in the *N. benthamiana* Ca<sup>2+</sup> reporter line SRLJ15 by *Agrobacterium*-mediated transient expression. Samples were challenged with 100nM flg22 or 1μM chitin. Ca<sup>2+</sup> accumulation was measured on a luminometer. HPE19 enhances Ca<sup>2+</sup> influx after chitin treatment. **F.** tGFP-HPE19 was transiently expressed in wild-type *N. benthamiana*. ROS production was measured after challenging with 100nM flg22 or 1μM chitin. ROS accumulation was measured on a luminometer. HPE19 suppresses ROS production after flg-22 treatment. Statistical differences were detected by two-tailed t-test, n=24. \*p<0.05, \*\*p<0.005, \*\*\*p<0.0005, \*\*\*\* p<0.00005.



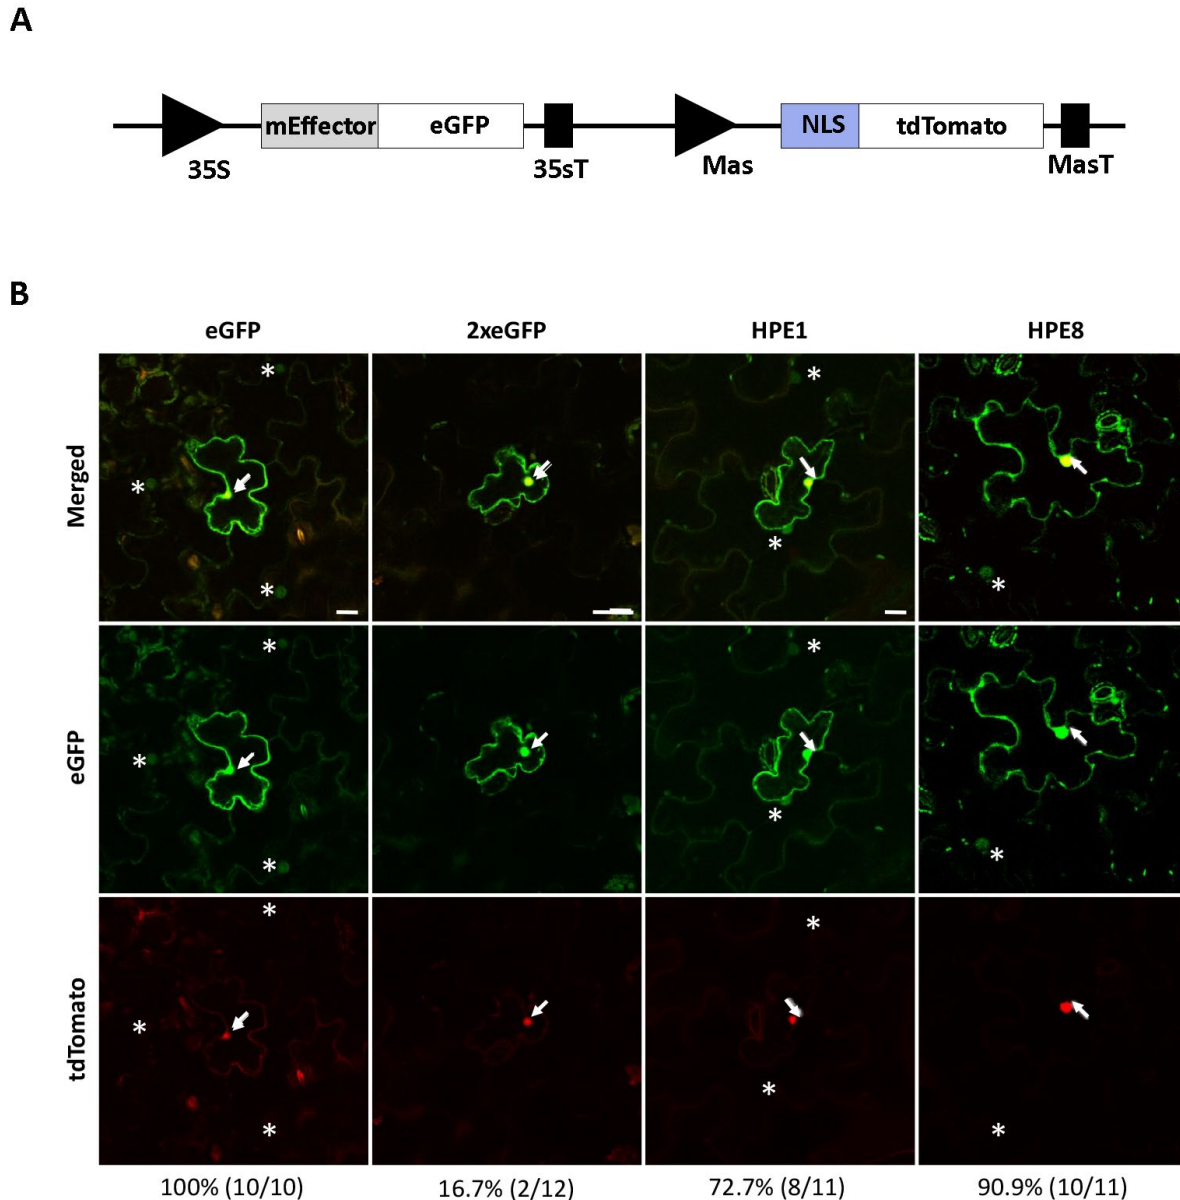

**Figure 5. Lso effectors are capable of cell-to-cell movement.** **A.** Schematic representation of the construct used to test the ability of Lso effectors to move cell-to-cell. Mature effectors (mEffector) lacking their N-terminal signal peptide cloned with a C-terminal fusion to eGFP in a binary vector also containing tdTomato targeted to the nucleus. **B.** Confocal images show the diffusion of Lso mEffector-GFP fusion proteins in *N. benthamiana* epidermal cells 24h after transient expression. The concentration of *Agrobacterium* for transient expression was  $OD_{600} = 0.0005$ , which enabled single cell transformation. The originally transformed plant cell exhibits both strong red fluorescence in the nucleus (arrows) and green fluorescent signals. Effector movement is determined by the detection of GFP but not tdTomato signal in cells surrounding the transformed cell, indicated as asterisks. Scale bars = 20  $\mu\text{m}$ . Numbers at the bottom indicate positive movement events out of total events observed.

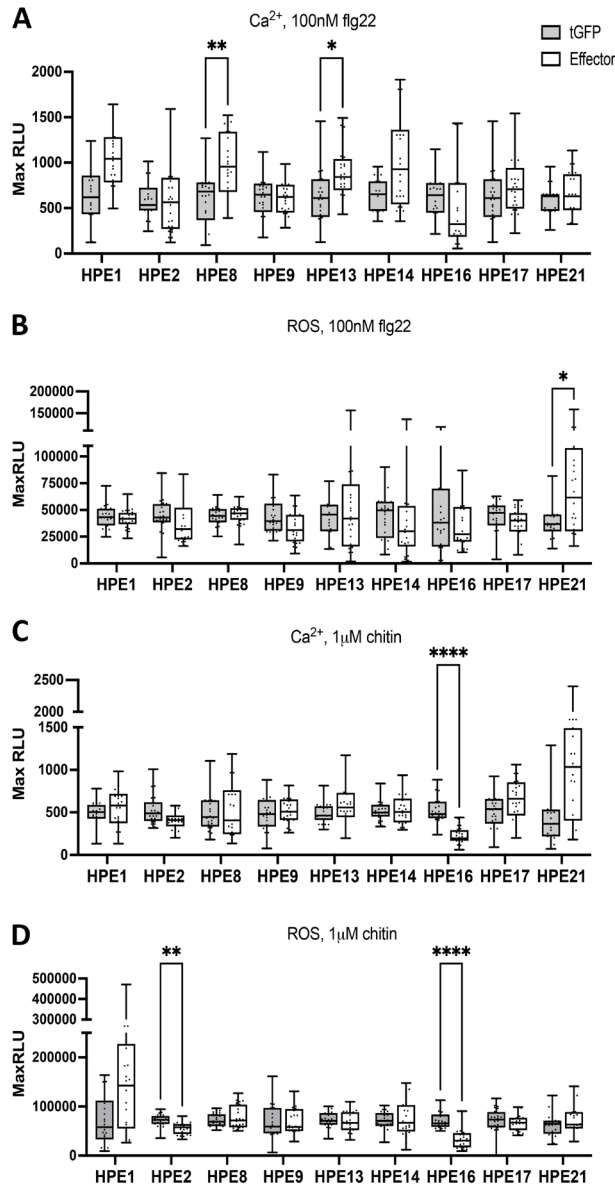

**Figure 6. The majority of Lso effectors do not alter plant immune responses to microbial features.** Individual effectors were transiently expressed in *N. benthamiana* or the *N. benthamiana* Ca<sup>2+</sup> reporter line SRLJ15 by *Agrobacterium* transient expression. *Agrobacterium* containing effector constructs were syringe infiltrated on a single leaf side-by-side with the tGFP control. Inoculations were performed by triplicate. Samples were taken 24h post-infiltration, floated in water or Coelenterazine solution for 16h and challenged with 100nM flg22 or 1µM chitin. ROS production and Ca<sup>2+</sup> accumulation were measured on a luminometer. The majority of Lso sec-dependent effectors do not alter or weakly enhance the calcium cytosolic accumulation triggered by **A.** flg22 or **C.** chitin perception. The majority of Lso sec-dependent effectors do not suppress the ROS production elicited by **B.** flg22 or **D.** chitin. Statistical differences were detected by multiple Mann-Whitney tests. Multiplicity adjusted P values from the Holm-Sidak method were used to compute adjusted P values. \*p<0.05, \*\*p<0.005, \*\*\*p<0.0005, \*\*\*\*p<0.00005.



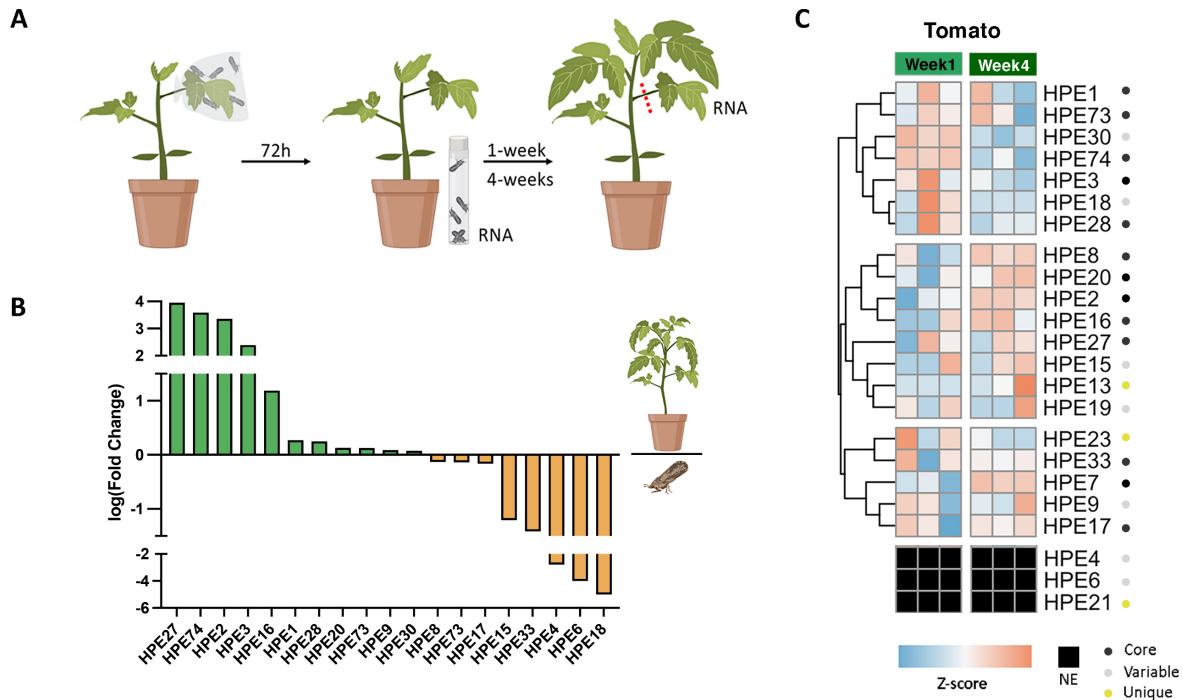

**Figure 7. Lso effectors exhibit dynamic expression according to organism and time.** **A.** Experimental design for analyzing effector expression in psyllids (*B. cockerelli*) and plants (tomato). Fifteen one-day-old haplotype B psyllids were caged on the second leaf of four-week-old tomato cv Money Maker plants using a mesh bag. Seventy-two hours later, psyllids were removed and stored at  $-80^{\circ}\text{C}$  for RNA extraction. One or four weeks later, midrib tissue from the originally infected leaf was collected for each biological replicate ( $n=3$ ). **B.** Comparison of Lso core, variable and unique effectors expression in tomato and psyllids. Lso *GlnA* was used for normalization. Samples of the same organism cluster together. The  $\Delta\Delta\text{Ct}$  method was used to analyze effector expression, with results shown on a Log<sub>2</sub> scale. **C.** Effector expression changes over time. The heatmap shows one experiment with three biological replicates and two different timepoints (one week and four weeks). Sets of effectors with similar expression patterns are shown as distinct clusters. Lso *GlnA* was used for normalization. The  $\Delta\text{Ct}$  method was used to analyze effector expression, with results shown as a Z-score. The pheatmap package in R was used to perform hierarchical clustering and visualize the results. NE= not expressed.
